# Supplementary material for: Stimulating bioplastic production with light energy by couplingRalstonia eutrophawith the photocatalyst graphitic carbon nitride
Source: Royal Society of Chemistry journal article supplement (doi:10.1039/c8gc03695k), 2019-01-01
Supplement: c8gc03695k1.pdf [file c8gc03695k1.pdf]

## Electronic Supplementary Information

### Stimulating bioplastic production with light energy by coupling *Ralstonia eutropha* with the photocatalyst graphitic carbon nitride

#### Authors

Mengying Xu<sup>‡a,b,c</sup>, Pier-Luc Tremblay<sup>‡a,b</sup>, Linlin Jiang<sup>a,b</sup>, and Tian Zhang<sup>\*a,b,c</sup>

<sup>a</sup>State Key Laboratory of Silicate Materials for Architectures, Wuhan University of Technology, Wuhan 430070, PR China, Email: tzhang@whut.edu.cn

<sup>b</sup>School of Chemistry, Chemical Engineering and Life Science, Wuhan University of Technology, Wuhan 430070, PR China

<sup>c</sup>School of Materials Science and Engineering, Wuhan University of Technology, Wuhan 430070, PR China

<sup>‡</sup>Both authors contributed equally to this work

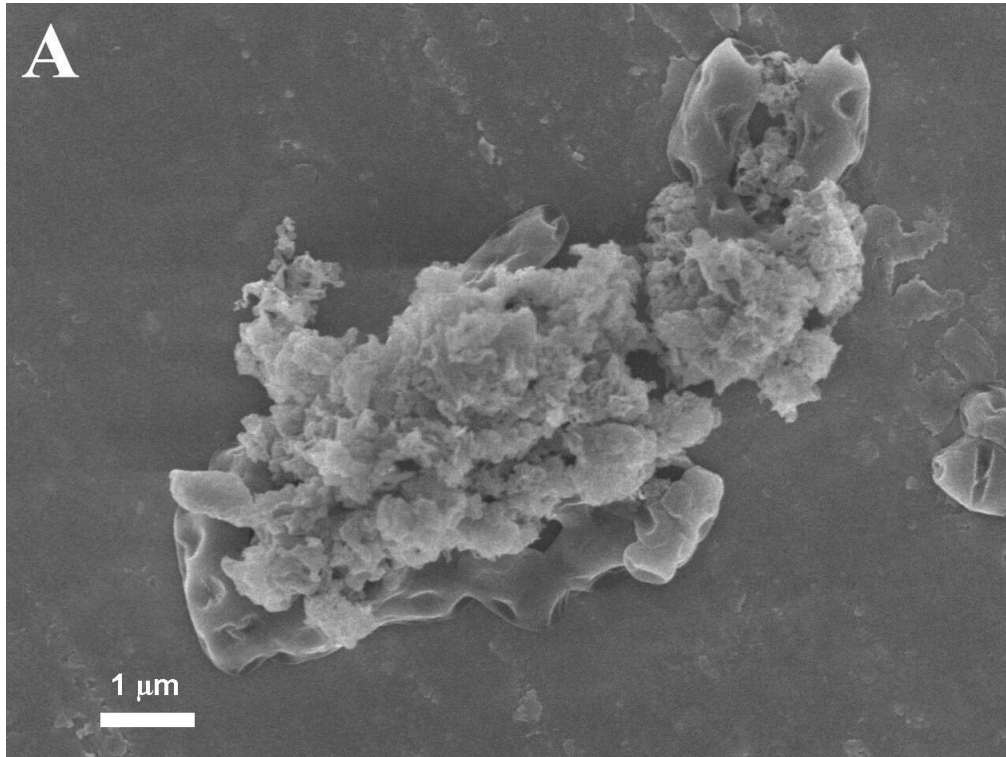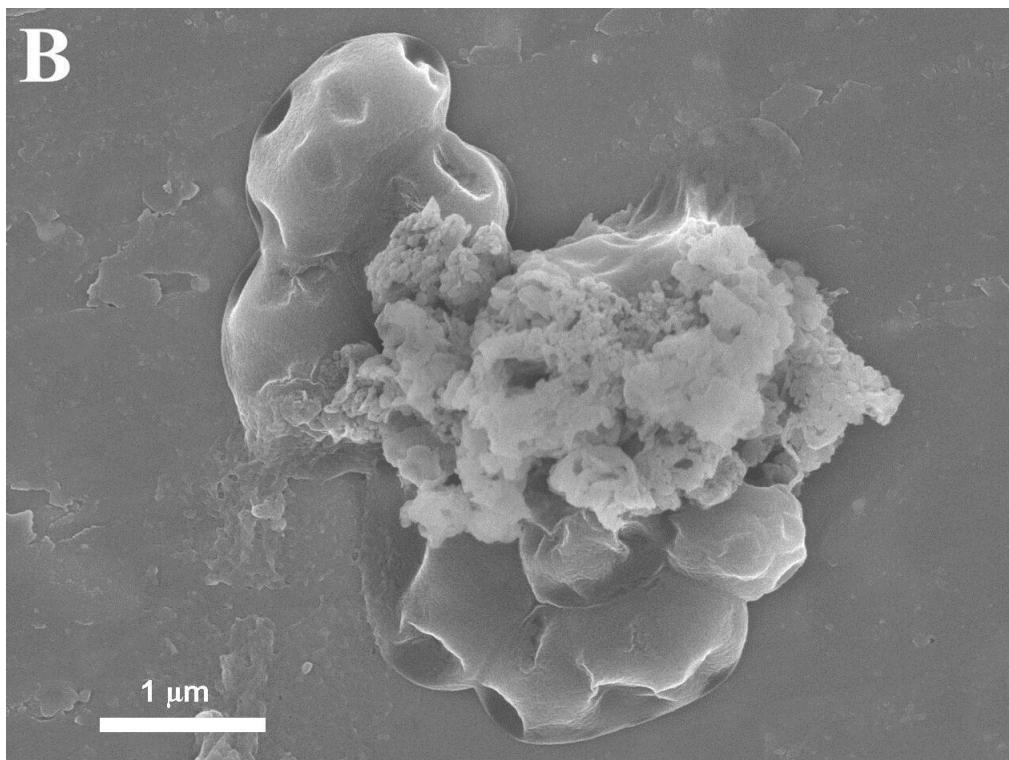

**Figure S1.** SEM images of aggregates formed after 24 hours when *R. eutropha* is grown under light in the presence of  $^{0.5}\text{g-C}_3\text{N}_4$  and  $^5\text{TEOA}$ .

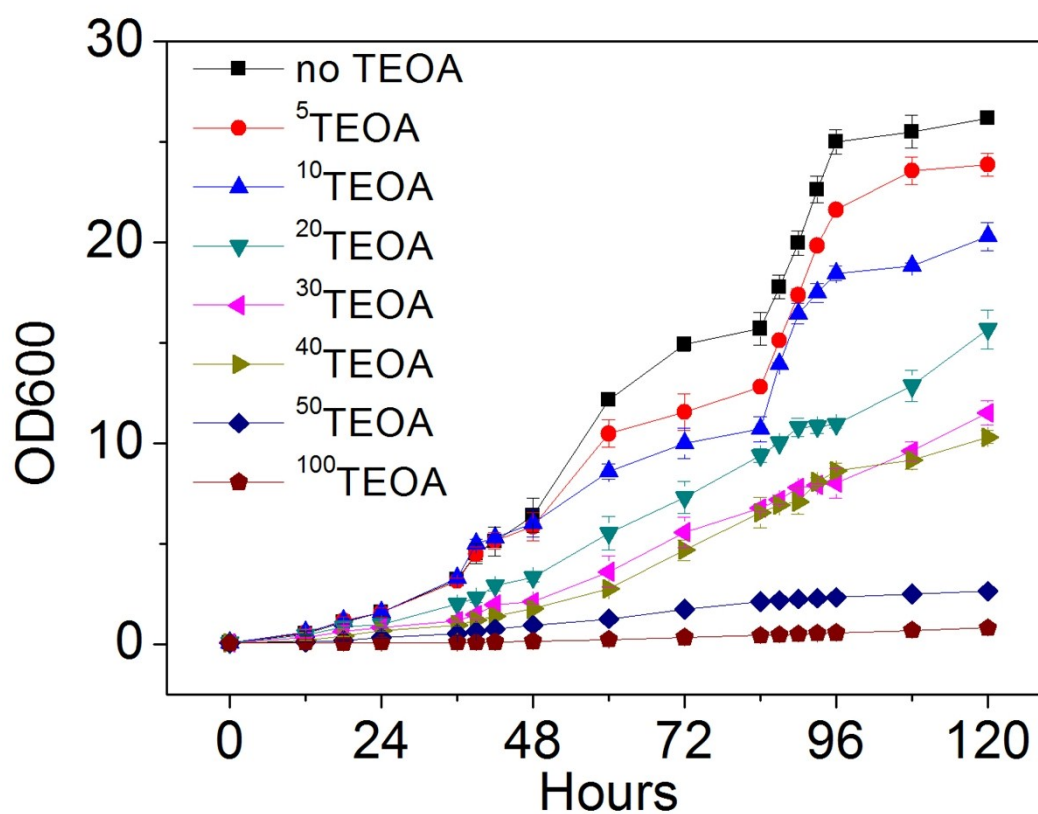

**Figure S2.** Growth of *R. eutropha* in the presence of different concentration of TEOA. Each curve is the mean and standard deviation of three replicates. OD600 represents the optical density at 600 nm of *R. eutropha* cultures, which is a measure of the concentration of bacterial cells in suspension.

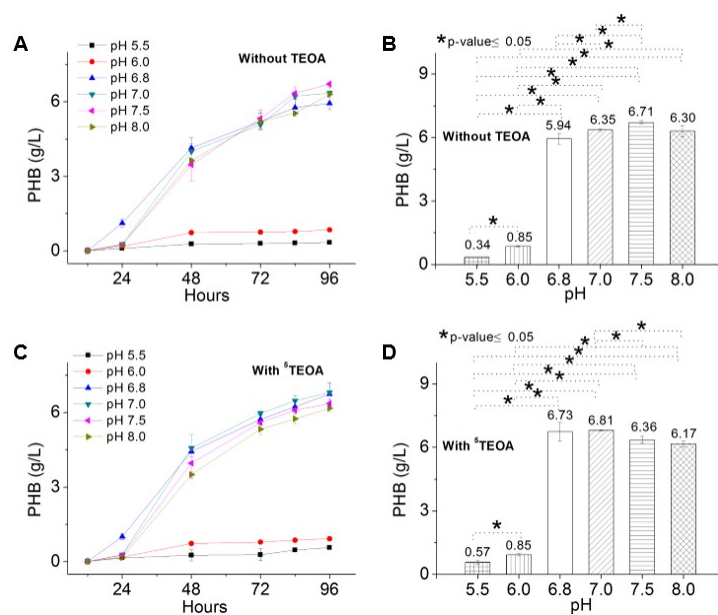

**Figure S3.** Impact of growth medium's pH on light-driven PHB production by *R. eutropha* from fructose with  $g\text{-C}_3\text{N}_4$ . (A) PHB production over time and (B) PHB production at 96 hours by *R. eutropha* and  $^{0.5}g\text{-C}_3\text{N}_4$  without TEOA under illumination at pH ranging from 5.5 to 8.0. (C) PHB production over time and (D) PHB production at 96 hours by *R. eutropha* and  $^{0.5}g\text{-C}_3\text{N}_4$  with  $^5\text{TEOA}$  under illumination at pH ranging from 5.5 to 8.0. Each curve and bar are the mean and standard deviation of three replicates. \* indicates that  $p$ -value is below 0.05.

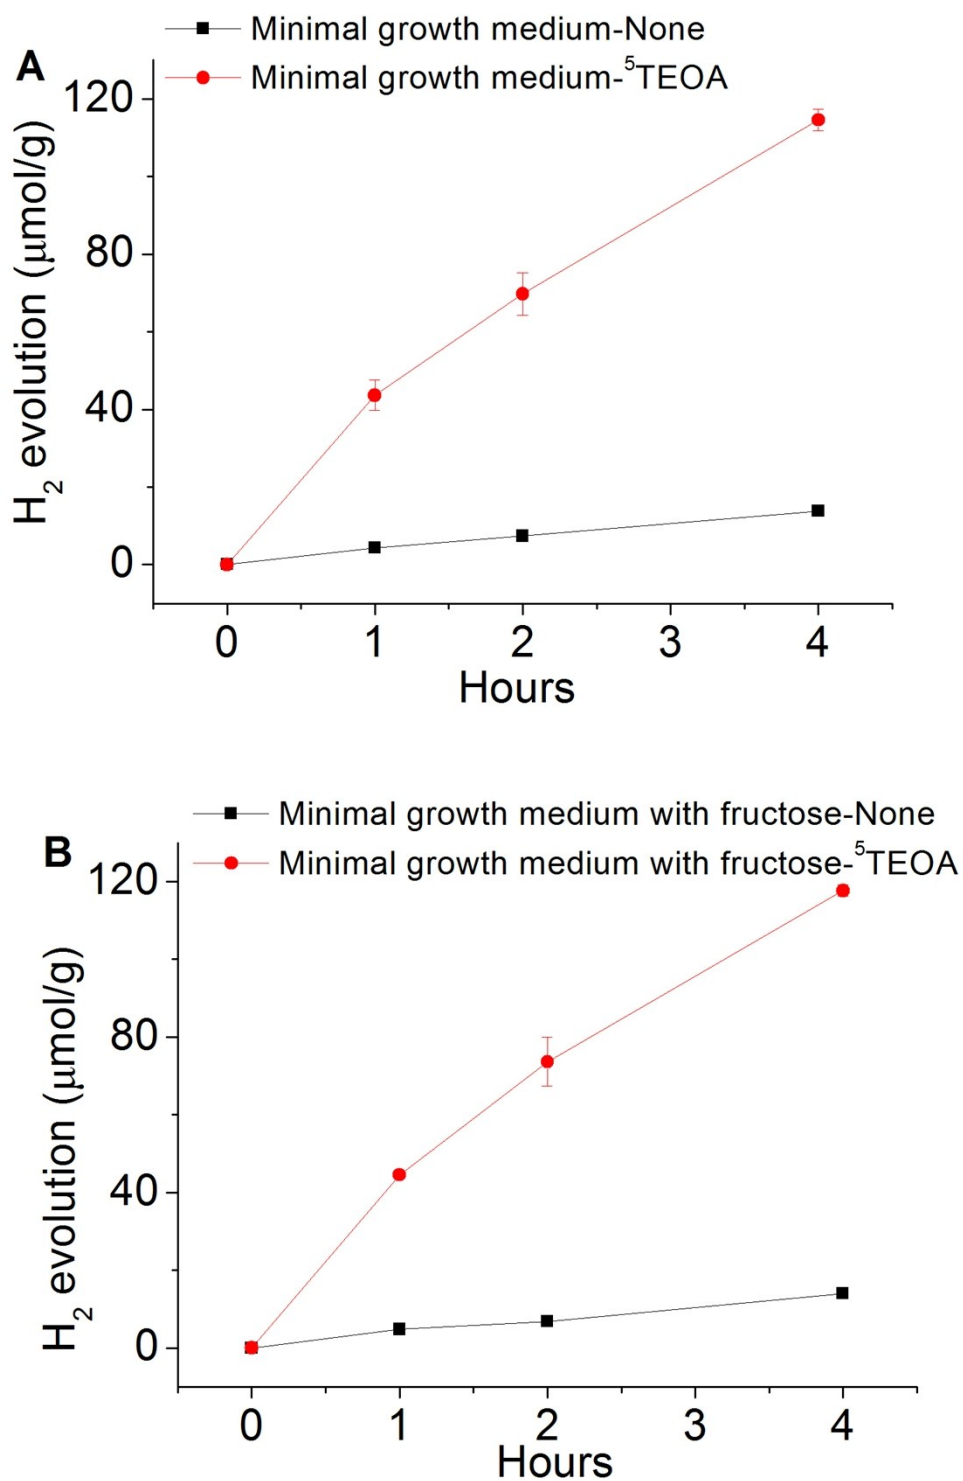

**Figure S4.** Photocatalytic H<sub>2</sub> evolution with <sup>0.5</sup>C<sub>3</sub>N<sub>4</sub> in the presence or not of <sup>5</sup>TEOA in (A) minimal growth medium and in (B) minimal growth medium with fructose. Each curve is the mean and standard deviation of three replicates.
